# Supplementary material for: Thermophysical properties of imidazolium tricyanomethanide ionic liquids: experiments and molecular simulation
Source: Royal Society of Chemistry journal article supplement (doi:10.1039/c6cp01943a), 2016-01-01
Supplement: c6cp01943a1.pdf [file c6cp01943a1.pdf]

## Supporting Information

### ***Thermophysical Properties of Imidazolium Tricyanomethanide Ionic Liquids: Experiments and Molecular Simulation***

*Lawien F. Zubeir<sup>a,\*</sup>, Marisa A.A. Rocha<sup>a,b</sup>, Niki Vergadou<sup>c</sup>, Wilko M.A. Weggemans<sup>a</sup>, Loukas*

*D. Peristeras<sup>c</sup>, Peter S. Schulz<sup>d</sup>, Ioannis G. Economou<sup>c,e</sup>, Maaïke C. Kroon<sup>a,f</sup>*

<sup>a</sup> Department of Chemical Engineering and Chemistry, Eindhoven University of Technology, Den Dolech 2, 5612 AZ Eindhoven, The Netherlands.

<sup>b</sup> University of Bremen, Engineering Thermodynamics, Badgasteiner Str. 1, D-28359 Bremen, Germany.

<sup>c</sup> Molecular Thermodynamics and Modelling of Materials Laboratory, Institute of Nanoscience and Nanotechnology, National Center of Scientific Research (NCSR) "Demokritos", GR-15310 Aghia Paraskevi Attikis, Greece.

<sup>d</sup> Department of Chemical and Biological Engineering, Institute of Chemical Reaction Engineering, University of Erlangen-Nuremberg, Egerlandstrasse 3, D-91058 Erlangen, Germany.

<sup>e</sup> Texas A&M University at Qatar, Chemical Engineering Program, Education City, PO Box 23874, Doha, Qatar.

<sup>f</sup> The Petroleum Institute, Department of Chemical Engineering, P.O. Box 2533, Abu Dhabi, United Arab Emirates.

\*Corresponding author: lawienf.zubeir@gmail.com

## TABLES

Table S1: Experimental results of density,  $\rho$ , at 0.1 MPa for the [C<sub>n</sub>mim][TCM] ionic liquid series as a function of temperature  $T$

| $T/K$               | $\rho/\text{kg}\cdot\text{m}^{-3}$ |                                        |                           |                           |                           |
|---------------------|------------------------------------|----------------------------------------|---------------------------|---------------------------|---------------------------|
|                     | [C <sub>2</sub> mim][TCM]          | [C <sub>4</sub> mim][TCM] <sup>1</sup> | [C <sub>6</sub> mim][TCM] | [C <sub>7</sub> mim][TCM] | [C <sub>8</sub> mim][TCM] |
| 288.15              | 1088.9                             |                                        | 1027.3                    | 1016.1                    | 1007.2                    |
| 293.15              | 1085.4                             |                                        | 1023.9                    | 1012.8                    | 1004.0                    |
| 298.15              | 1081.8                             | 1046.2                                 | 1020.6                    | 1009.6                    | 1000.8                    |
| 303.15              | 1078.2                             | 1042.9                                 | 1017.3                    | 1006.4                    | 997.9                     |
| 308.15              | 1074.7                             | 1039.5                                 | 1014.1                    | 1003.1                    | 994.7                     |
| 313.15              | 1071.2                             | 1036.1                                 | 1010.8                    | 999.9                     | 991.5                     |
| 318.15              | 1067.7                             | 1032.8                                 | 1007.6                    | 997.0                     | 988.3                     |
| 323.15              | 1064.2                             | 1029.5                                 | 1004.4                    | 993.8                     | 985.2                     |
| 328.15              | 1060.7                             | 1026.3                                 | 1001.2                    | 990.7                     | 982.0                     |
| 333.15              | 1057.3                             | 1023.0                                 | 998.3                     | 987.5                     | 978.9                     |
| 338.15              | 1053.9                             | 1019.8                                 | 995.1                     | 984.4                     | 975.8                     |
| 343.15              | 1050.5                             | 1016.5                                 | 991.9                     | 981.3                     | 972.7                     |
| 348.15              | 1047.1                             | 1013.3                                 | 988.8                     | 978.2                     | 969.6                     |
| 353.15              | 1043.7                             | 1010.2                                 | 985.6                     | 975.1                     | 966.5                     |
| 358.15              | 1040.4                             | 1007.0                                 | 982.5                     | 972.0                     | 963.4                     |
| 363.15              | 1037.1                             | 1003.9                                 | 979.5                     | 969.0                     | 960.4                     |
| Water mass fraction | $114\cdot 10^{-6}$                 | $30\cdot 10^{-6}$                      | $128\cdot 10^{-6}$        | $43.6\cdot 10^{-6}$       | $80.4\cdot 10^{-6}$       |

Table S2: Fitting parameters of eq.(5) and molar volume at 298.15 K and 0.1 MPa

| IL                        | $a/\text{kg}\cdot\text{m}^{-3}$ | $b/10^{-1}\text{ kg}\cdot\text{m}^{-3}\cdot\text{K}^{-1}$ | $c/10^{-4}\text{ kg}\cdot\text{m}^{-3}\cdot\text{K}^{-2}$ | $V_m(T=298.15\text{ K})/10^{-4}\text{ m}^3\cdot\text{mol}^{-1}$ |
|---------------------------|---------------------------------|-----------------------------------------------------------|-----------------------------------------------------------|-----------------------------------------------------------------|
| [C <sub>2</sub> mim][TCM] | 1328.0                          | -9.3968                                                   | 3.8165                                                    | 1.86                                                            |
| [C <sub>4</sub> mim][TCM] | 1285.7                          | -9.2758                                                   | 4.1758                                                    | 2.19                                                            |
| [C <sub>6</sub> mim][TCM] | 1249.0                          | -8.7582                                                   | 3.6835                                                    | 2.52                                                            |
| [C <sub>7</sub> mim][TCM] | 1220.1                          | -7.7267                                                   | 2.2386                                                    | 2.69                                                            |
| [C <sub>8</sub> mim][TCM] | 1199.1                          | -6.9806                                                   | 1.1169                                                    | 2.85                                                            |

**Table S3: Experimental data for dynamic viscosities,  $\eta$ , at 0.1 MPa for the [C<sub>n</sub>mim][TCM] ionic liquid series as a function of temperature  $T$**

| $T/K$               | $\eta/\text{mPa}\cdot\text{s}$ |                                        |                           |                           |                           |
|---------------------|--------------------------------|----------------------------------------|---------------------------|---------------------------|---------------------------|
|                     | [C <sub>2</sub> mim][TCM]      | [C <sub>4</sub> mim][TCM] <sup>1</sup> | [C <sub>6</sub> mim][TCM] | [C <sub>7</sub> mim][TCM] | [C <sub>8</sub> mim][TCM] |
| 288.15              | 20.615                         |                                        | 70.301                    | 83.457                    | 101.740                   |
| 293.15              | 17.153                         |                                        | 53.640                    | 63.143                    | 76.261                    |
| 298.15              | 14.481                         | 27.840                                 | 41.952                    | 48.917                    | 58.595                    |
| 303.15              | 12.394                         | 22.798                                 | 33.411                    | 38.701                    | 45.928                    |
| 308.15              | 10.734                         | 18.972                                 | 27.151                    | 31.208                    | 36.731                    |
| 313.15              | 9.3915                         | 16.009                                 | 22.424                    | 25.586                    | 29.886                    |
| 318.15              | 8.2927                         | 13.675                                 | 18.803                    | 21.298                    | 24.695                    |
| 323.15              | 7.3820                         | 11.810                                 | 15.957                    | 17.966                    | 20.687                    |
| 328.15              | 6.6175                         | 10.297                                 | 13.704                    | 15.328                    | 17.554                    |
| 333.15              | 5.9717                         | 9.0572                                 | 11.900                    | 13.224                    | 15.055                    |
| 338.15              | 5.4223                         | 8.0292                                 | 10.428                    | 11.514                    | 13.040                    |
| 343.15              | 4.9492                         | 7.1680                                 | 9.2108                    | 10.119                    | 11.398                    |
| 348.15              | 4.5393                         | 6.4431                                 | 8.1971                    | 8.9603                    | 10.044                    |
| 353.15              | 4.1801                         | 5.8300                                 | 7.3388                    | 7.9906                    | 8.9281                    |
| 358.15              | 3.8697                         | 5.3047                                 | 6.6200                    | 7.1674                    | 7.9725                    |
| 363.15              | 3.5917                         | 4.8519                                 | 6.0035                    | 6.4710                    | 7.1703                    |
| Water mass fraction | $114\cdot 10^{-6}$             | $30\cdot 10^{-6}$                      | $128\cdot 10^{-6}$        | $43.6\cdot 10^{-6}$       | $80.4\cdot 10^{-6}$       |

**Table S4: Fitted parameters of the VFT equation (6) to viscosity data for the studied ILs and the derived energy barrier at 298.15 K**

| IL                        | $A_\eta/\text{mPa}\cdot\text{s}$ | $B_\eta/K$      | $C_\eta/K$      | $E(T=298.15\text{ K})/\text{kJ}\cdot\text{mol}^{-1}$ |
|---------------------------|----------------------------------|-----------------|-----------------|------------------------------------------------------|
| [C <sub>2</sub> mim][TCM] | $0.229 \pm 0.003$                | $533.1 \pm 4.5$ | $169.6 \pm 0.6$ | $23.9 \pm 0.6$                                       |
| [C <sub>4</sub> mim][TCM] | $0.193 \pm 0.001$                | $595.9 \pm 2.0$ | $178.2 \pm 0.2$ | $30.6 \pm 0.3$                                       |
| [C <sub>6</sub> mim][TCM] | $0.210 \pm 0.001$                | $594.0 \pm 1.8$ | $186.0 \pm 0.2$ | $34.9 \pm 0.4$                                       |
| [C <sub>7</sub> mim][TCM] | $0.186 \pm 0.001$                | $635.9 \pm 1.1$ | $184.0 \pm 0.1$ | $36.1 \pm 0.2$                                       |
| [C <sub>8</sub> mim][TCM] | $0.178 \pm 0.001$                | $663.7 \pm 2.1$ | $183.7 \pm 0.2$ | $37.4 \pm 0.4$                                       |

Table S5: Experimentally determined data for the surface tension,  $\gamma$ , for the  $[C_n\text{mim}][\text{TCM}]$  ionic liquid series as a function of temperature  $T$

| $[C_2\text{mim}][\text{TCM}]$ |                                      | $[C_4\text{mim}][\text{TCM}]^1$ |                                      | $[C_6\text{mim}][\text{TCM}]$ |                                      | $[C_7\text{mim}][\text{TCM}]$ |                                      | $[C_8\text{mim}][\text{TCM}]$ |                                      |
|-------------------------------|--------------------------------------|---------------------------------|--------------------------------------|-------------------------------|--------------------------------------|-------------------------------|--------------------------------------|-------------------------------|--------------------------------------|
| $T/\text{K}$                  | $\gamma/\text{mN}\cdot\text{m}^{-1}$ | $T/\text{K}$                    | $\gamma/\text{mN}\cdot\text{m}^{-1}$ | $T/\text{K}$                  | $\gamma/\text{mN}\cdot\text{m}^{-1}$ | $T/\text{K}$                  | $\gamma/\text{mN}\cdot\text{m}^{-1}$ | $T/\text{K}$                  | $\gamma/\text{mN}\cdot\text{m}^{-1}$ |
| 298.14                        | 43.82 ± 0.13                         | 298.32                          | 47.04 ± 0.14                         | 298.60                        | 41.92 ± 0.13                         | 299.17                        | 39.64 ± 0.16                         | 297.65                        | 35.64 ± 0.14                         |
| 308.05                        | 42.29 ± 0.11                         | 307.12                          | 46.29 ± 0.07                         | 308.45                        | 41.24 ± 0.12                         | 307.27                        | 39.22 ± 0.11                         | 307.08                        | 35.05 ± 0.11                         |
| 318.49                        | 41.08 ± 0.12                         | 318.81                          | 45.14 ± 0.14                         | 320.28                        | 40.17 ± 0.14                         | 316.54                        | 38.55 ± 0.11                         | 318.84                        | 34.18 ± 0.11                         |
| 327.95                        | 39.89 ± 0.13                         | 328.45                          | 44.30 ± 0.12                         | 331.24                        | 39.35 ± 0.18                         | 326.41                        | 37.87 ± 0.12                         | 329.57                        | 33.57 ± 0.13                         |
| 339.09                        | 38.88 ± 0.12                         | 341.33                          | 43.30 ± 0.10                         | 339.38                        | 38.57 ± 0.44                         | 337.36                        | 37.15 ± 0.13                         | 340.06                        | 33.04 ± 0.16                         |
| Water mass fraction           |                                      |                                 |                                      |                               |                                      |                               |                                      |                               |                                      |
| Initial                       | 1.8·10 <sup>-3</sup>                 |                                 | 7.3·10 <sup>-4</sup>                 |                               | 7.0·10 <sup>-4</sup>                 |                               | 1.2·10 <sup>-3</sup>                 |                               | 2.7·10 <sup>-3</sup>                 |
| Final                         | 6.2·10 <sup>-3</sup>                 |                                 | 5.2·10 <sup>-3</sup>                 |                               | 5.0·10 <sup>-3</sup>                 |                               | 5.2·10 <sup>-3</sup>                 |                               | 5.2·10 <sup>-3</sup>                 |

$u(T) = 0.01$  K and the uncertainty limits represent the 95% ( $k = 2$ ) confidence level.

Table S6: Surface tension,  $\gamma$ , of standard solvents. Experimental values measured here and literature data

| Water           |                                      |                                     |                                      | Toluene      |                                      |                                 |                                      | Diisododecyl phthalate |                                      |                                    |                                      |
|-----------------|--------------------------------------|-------------------------------------|--------------------------------------|--------------|--------------------------------------|---------------------------------|--------------------------------------|------------------------|--------------------------------------|------------------------------------|--------------------------------------|
| Experimental    |                                      | Vargafik <i>et al.</i> <sup>2</sup> |                                      | Experimental |                                      | Kahl <i>et al.</i> <sup>3</sup> |                                      | Experimental           |                                      | Caetano <i>et al.</i> <sup>4</sup> |                                      |
| $T/\text{K}$    | $\gamma/\text{mN}\cdot\text{m}^{-1}$ | $T/\text{K}$                        | $\gamma/\text{mN}\cdot\text{m}^{-1}$ | $T/\text{K}$ | $\gamma/\text{mN}\cdot\text{m}^{-1}$ | $T/\text{K}$                    | $\gamma/\text{mN}\cdot\text{m}^{-1}$ | $T/\text{K}$           | $\gamma/\text{mN}\cdot\text{m}^{-1}$ | $T/\text{K}$                       | $\gamma/\text{mN}\cdot\text{m}^{-1}$ |
| 298.19          | 71.46 ± 0.06                         | 298.15                              | 71.99 ± 0.36                         | 298.95       | 27.97 ± 0.08                         | 297.82                          | 27.76 ± 0.1                          | 290.61                 | 29.82 ± 0.14                         | 288.15                             | 30.5 ± 0.15                          |
| 308.12          | 70.03 ± 0.08                         | 303.15                              | 71.2 ± 0.36                          | 309.28       | 26.71 ± 0.10                         | 302.83                          | 27.17 ± 0.1                          | 294.07                 | 29.49 ± 0.16                         | 293.15                             | 30.2 ± 0.15                          |
| 316.74          | 68.41 ± 0.07                         | 308.15                              | 70.41 ± 0.35                         | 317.88       | 25.72 ± 0.07                         | 307.86                          | 26.6 ± 0.1                           | 298.33                 | 29.20 ± 0.16                         | 298.15                             | 29.7 ± 0.15                          |
| 326.99          | 66.38 ± 0.11                         | 313.15                              | 69.6 ± 0.35                          | 329.20       | 24.34 ± 0.06                         | 312.87                          | 26.03 ± 0.06                         | 302.96                 | 28.92 ± 0.12                         | 303.15                             | 29.4 ± 0.15                          |
|                 |                                      | 318.15                              | 68.78 ± 0.34                         | 286.99       | 29.12 ± 0.06                         | 317.86                          | 25.46 ± 0.08                         | 307.85                 | 28.51 ± 0.12                         | 308.15                             | 29.1 ± 0.15                          |
|                 |                                      | 323.15                              | 67.94 ± 0.34                         | 304.50       | 27.19 ± 0.09                         | 327.88                          | 24.29 ± 0.08                         |                        |                                      |                                    |                                      |
|                 |                                      |                                     |                                      | 323.86       | 24.92 ± 0.07                         |                                 |                                      |                        |                                      |                                    |                                      |
| <b>AARD (%)</b> |                                      | 0.84                                |                                      |              |                                      | 0.85                            |                                      |                        |                                      | 1.84                               |                                      |

$u(T) = 0.01$  K and the uncertainty limits represent the 95% ( $k = 2$ ) confidence level.

Table S7: The surface enthalpy,  $H^A$ , and the surface entropy,  $S^A$ , of the  $[C_n\text{mim}][\text{TCM}]$  ILs

| IL                              | $H^A/\text{mN}\cdot\text{m}^{-1}$ | $S^A/\text{mN}\cdot\text{m}^{-1}\cdot\text{K}^{-1}$ |
|---------------------------------|-----------------------------------|-----------------------------------------------------|
| $[C_2\text{mim}][\text{TCM}]$   | 72.5 ± 2.1                        | 0.088 ± 0.007                                       |
| $[C_4\text{mim}][\text{TCM}]^1$ | 73.3 ± 1.4                        | 0.088 ± 0.005                                       |
| $[C_6\text{mim}][\text{TCM}]$   | 66.5 ± 1.4                        | 0.082 ± 0.004                                       |
| $[C_7\text{mim}][\text{TCM}]$   | 59.6 ± 1.0                        | 0.066 ± 0.003                                       |
| $[C_8\text{mim}][\text{TCM}]$   | 54.1 ± 1.6                        | 0.062 ± 0.005                                       |

Uncertainty limits represent the 95% ( $k = 2$ ) confidence level

Table S8: Surface enthalpies,  $H^A$ , and entropies,  $S^A$ , of a selected group of organic solvents<sup>5</sup>

| Organic solvent | $H^A/\text{mN}\cdot\text{m}^{-1}$ | $S^A/\text{mN}\cdot\text{m}^{-1}\cdot\text{K}^{-1}$ |
|-----------------|-----------------------------------|-----------------------------------------------------|
| Hexane          | 48.38                             | 0.1023                                              |
| Heptane         | 48.87                             | 0.0980                                              |
| Cyclohexane     | 60.06                             | 0.1188                                              |
| Toluene         | 63.36                             | 0.1189                                              |
| Ethylbenzene    | 61.38                             | 0.1094                                              |
| Iodobenzene     | 72.20                             | 0.1123                                              |
| Quinoline       | 74.29                             | 0.1063                                              |
| Furfural        | 82.64                             | 0.1327                                              |
| Cyclohexanone   | 71.60                             | 0.1242                                              |
| Hexanol         | 50.98                             | 0.0900                                              |
| Piperidine      | 63.30                             | 0.1153                                              |
| Cyclopentanone  | 65.60                             | 0.1100                                              |

Table S9: Electrical conductivity,  $\kappa$ , of [C<sub>n</sub>mim][TCM] as a function of temperature  $T$

| [C <sub>2</sub> mim][TCM] |                          | [C <sub>4</sub> mim][TCM] <sup>1</sup> |                          | [C <sub>6</sub> mim][TCM] |                          | [C <sub>8</sub> mim][TCM] |                          |
|---------------------------|--------------------------|----------------------------------------|--------------------------|---------------------------|--------------------------|---------------------------|--------------------------|
| $T/K$                     | $\kappa/mS\cdot cm^{-1}$ | $T/K$                                  | $\kappa/mS\cdot cm^{-1}$ | $T/K$                     | $\kappa/mS\cdot cm^{-1}$ | $T/K$                     | $\kappa/mS\cdot cm^{-1}$ |
| 293.15                    | 23.70                    | 293.25                                 | 10.27                    | 293.15                    | 5.09                     | 293.15                    | 2.85                     |
| 300.05                    | 30.20                    | 300.35                                 | 13.03                    | 300.65                    | 6.89                     | 300.55                    | 3.85                     |
| 309.85                    | 34.00                    | 309.75                                 | 16.30                    | 310.15                    | 9.19                     | 310.15                    | 5.25                     |
| 316.35                    | 37.70                    | 316.25                                 | 18.40                    | 316.45                    | 11.28                    | 316.45                    | 6.44                     |
| 324.35                    | 42.70                    | 325.55                                 | 22.00                    | 324.55                    | 13.43                    | 325.55                    | 8.27                     |
| 333.85                    | 47.60                    | 333.15                                 | 25.70                    | 333.65                    | 16.45                    | 334.15                    | 10.28                    |
| 341.65                    | 52.60                    | 341.65                                 | 28.80                    | 341.15                    | 18.02                    | 341.95                    | 11.90                    |
| 348.65                    | 57.00                    | 347.95                                 | 31.70                    | 347.75                    | 21.20                    | 349.15                    | 13.50                    |
| 360.65                    | 62.50                    | 360.25                                 | 36.10                    | 360.45                    | 24.80                    | 360.65                    | 16.32                    |
| 367.65                    | 66.20                    | 367.65                                 | 39.60                    | 369.15                    | 27.70                    | 368.65                    | 17.25                    |
|                           |                          | Water mass fraction                    |                          |                           |                          |                           |                          |
| 1.05·10 <sup>-3</sup>     |                          | 1.1·10 <sup>-3</sup>                   |                          | 6.0·10 <sup>-4</sup>      |                          | 5.0·10 <sup>-4</sup>      |                          |

Table S10: VFT parameters of electrical conductivity,  $\kappa$ , for [C<sub>n</sub>mim][TCM] ILs

| IL                        | $\kappa_0/mS\cdot cm^{-1}$ | $B/K$  | $T_0/K$ | $R^2$ |
|---------------------------|----------------------------|--------|---------|-------|
| [C <sub>2</sub> mim][TCM] | 251.86                     | 233.57 | 192.71  | 0.998 |
| [C <sub>4</sub> mim][TCM] | 233.85                     | 308.82 | 194.09  | 0.999 |
| [C <sub>6</sub> mim][TCM] | 179.16                     | 299.03 | 209.02  | 0.999 |
| [C <sub>8</sub> mim][TCM] | 103.75                     | 259.54 | 222.25  | 0.998 |

Table S11: Estimation of the cations and the anion effective radius in [C<sub>n</sub>mim][TCM] ILs

| Ion                               | Radius/Å |
|-----------------------------------|----------|
| [C <sub>2</sub> mim] <sup>+</sup> | 3.26     |
| [C <sub>4</sub> mim] <sup>+</sup> | 3.54     |
| [C <sub>6</sub> mim] <sup>+</sup> | 3.77     |
| [C <sub>8</sub> mim] <sup>+</sup> | 4.01     |
| [TCM] <sup>-</sup>                | 2.84     |

The effective ion sizes were extracted from the ion volume as calculated on minimized isolated ion structures under the assumption of a spherical ion shape. The atomic van der Waals radii considered for the ionic volume calculation correspond to the ones of the force field in use for the molecular simulations<sup>6</sup> augmented by 0.1 Å.

Table S12: Deviation,  $\Delta W$ , of the [TCM]<sup>-</sup>-based ILs from the reference KCl line

| IL                        | $T / K$ | $\Delta W$ | $\Delta W$ (Adjusted) |
|---------------------------|---------|------------|-----------------------|
| [C <sub>2</sub> mim][TCM] | 298.15  | 0.13       | -0.05                 |
|                           | 318.15  | 0.21       | 0.03                  |
|                           | 338.15  | 0.28       | 0.10                  |
|                           | 363.15  | 0.35       | 0.17                  |
| [C <sub>4</sub> mim][TCM] | 298.15  | 0.13       | -0.06                 |
|                           | 318.15  | 0.23       | 0.03                  |
|                           | 338.15  | 0.31       | 0.11                  |
|                           | 363.15  | 0.38       | 0.18                  |
| [C <sub>6</sub> mim][TCM] | 298.15  | 0.18       | -0.03                 |
|                           | 318.15  | 0.26       | 0.05                  |
|                           | 338.15  | 0.32       | 0.11                  |
|                           | 363.15  | 0.39       | 0.18                  |
| [C <sub>8</sub> mim][TCM] | 298.15  | 0.25       | 0.03                  |
|                           | 318.15  | 0.31       | 0.09                  |
|                           | 338.15  | 0.38       | 0.16                  |
|                           | 363.15  | 0.46       | 0.24                  |

Table S13: Self-diffusion coefficients,  $D_{self}$ , of the cations [C<sub>n</sub>mim]<sup>+</sup> (n = 2, 4, 6, 8) and the [TCM]<sup>-</sup> anion as a function of temperature  $T$

| Experimental                      |        |                               | Molecular simulation          |                                   |                    |                                   |                    |                                   |                    |                                   |                    |
|-----------------------------------|--------|-------------------------------|-------------------------------|-----------------------------------|--------------------|-----------------------------------|--------------------|-----------------------------------|--------------------|-----------------------------------|--------------------|
| Cation                            | $T/K$  | $D_{self}/10^{-11}m^2 s^{-1}$ | $D_{self}/10^{-11}m^2 s^{-1}$ |                                   |                    |                                   |                    |                                   |                    |                                   |                    |
|                                   |        |                               | $T/K$                         | [C <sub>2</sub> mim] <sup>+</sup> | [TCM] <sup>-</sup> | [C <sub>4</sub> mim] <sup>+</sup> | [TCM] <sup>-</sup> | [C <sub>6</sub> mim] <sup>+</sup> | [TCM] <sup>-</sup> | [C <sub>8</sub> mim] <sup>+</sup> | [TCM] <sup>-</sup> |
| [C <sub>2</sub> mim] <sup>+</sup> | 293.15 | $7.30 \pm 0.17$               | 300                           | 6.1                               | 5.3                | 3.6                               | 3.7                | 2.0                               | 2.3                | 1.1                               | 1.7                |
|                                   | 298.15 |                               | 315                           | 10.8                              | 10.3               | 7.2                               | 7.4                | 3.9                               | 4.5                | 3.1                               | 4.0                |
|                                   | 303.15 |                               | 330                           | 15                                | 15.2               | 10.7                              | 13                 | 7.1                               | 8.0                | 4.8                               | 7.3                |
|                                   | 313.15 |                               | 345                           | 24.1                              | 24.3               | 16.8                              | 18.8               | 11.6                              | 13.9               | 9.1                               | 12                 |
|                                   | 323.15 |                               | 366                           | 36                                | 34.4               | 27.6                              | 28.9               | 19.7                              | 24.3               | 14.7                              | 20.2               |
| [C <sub>4</sub> mim] <sup>+</sup> | 298.15 | 3.95                          |                               |                                   |                    |                                   |                    |                                   |                    |                                   |                    |
| [C <sub>6</sub> mim] <sup>+</sup> | 298.15 | 2.73                          |                               |                                   |                    |                                   |                    |                                   |                    |                                   |                    |
| [C <sub>8</sub> mim] <sup>+</sup> | 298.15 | 1.72                          |                               |                                   |                    |                                   |                    |                                   |                    |                                   |                    |

## FIGURES

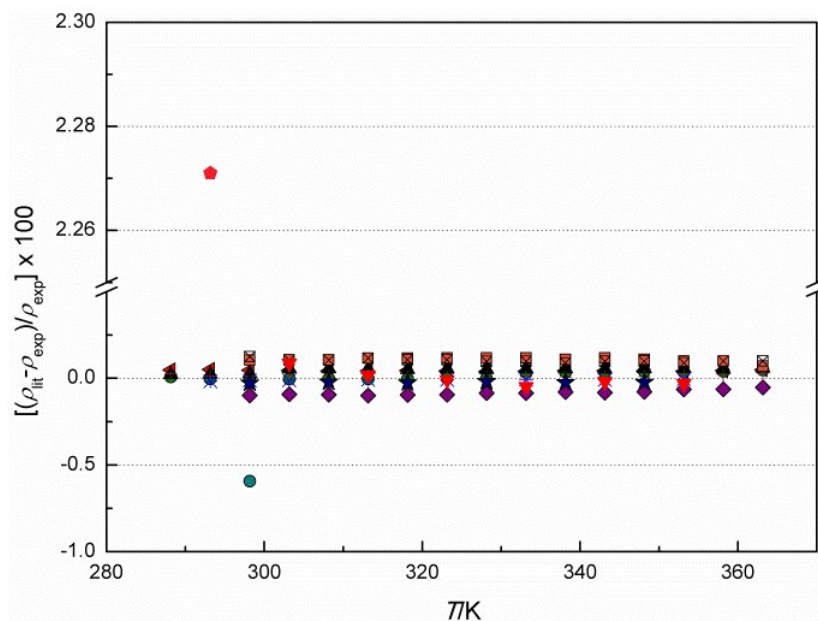

Figure S1: Relative deviations between the experimentally measured densities in this work and literature data. Koller *et al.*<sup>2</sup>:  $\blacklozenge$  - [C<sub>2</sub>mim][TCM];  $\oplus$  - [C<sub>4</sub>mim][TCM];  $\otimes$  - [C<sub>6</sub>mim][TCM];  $\square$  - [C<sub>8</sub>mim][TCM]. Carvalho *et al.*<sup>3</sup>:  $\blacksquare$  - [C<sub>4</sub>mim][TCM]. Larriba *et al.*<sup>4</sup>:  $\bullet$  - [C<sub>2</sub>mim][TCM]. Yoshida *et al.*<sup>5</sup>:  $\odot$  - [C<sub>2</sub>mim][TCM]. Neves *et al.*<sup>6</sup>:  $\text{\textcircled{+}}$  - [C<sub>2</sub>mim][TCM];  $\text{\textcircled{*}}$  - [C<sub>4</sub>mim][TCM]. Mahurin *et al.*<sup>7</sup>:  $\otimes$  - [C<sub>2</sub>mim][TCM]. Gardas *et al.*<sup>8</sup>:  $\square$  - [C<sub>4</sub>mim][TCM]. Królikowski *et al.*<sup>9</sup>:  $\text{\textcircled{+}}$  - [C<sub>2</sub>mim][TCM].

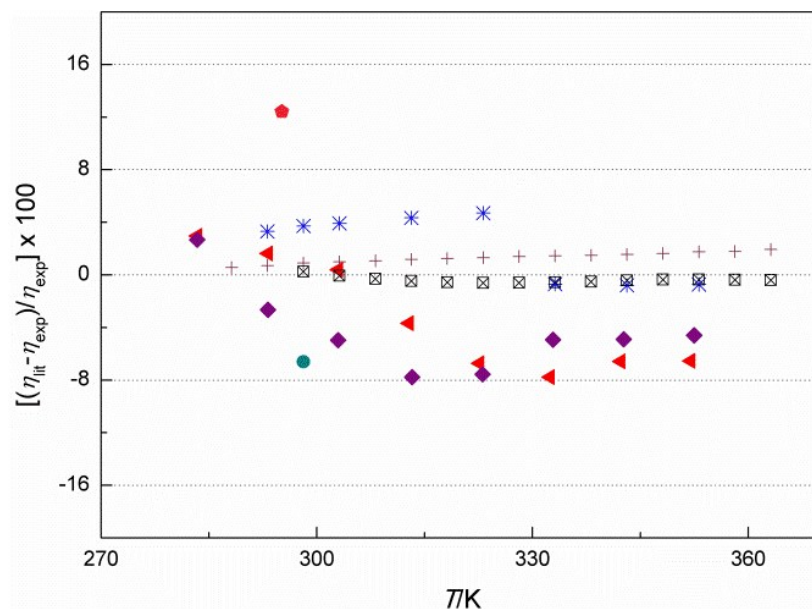

Figure S2: Relative deviations between the experimentally measured viscosities in this work and literature data. Bi *et al.*<sup>10</sup>:  $\blacklozenge$  - [C<sub>2</sub>mim][TCM];  $\oplus$  - [C<sub>4</sub>mim][TCM]; Larriba *et al.*<sup>4</sup>:  $\bullet$  - [C<sub>2</sub>mim][TCM]. Yoshida *et al.*<sup>5</sup>:  $\odot$  - [C<sub>2</sub>mim][TCM]. Neves *et al.*<sup>6</sup>:  $\text{\textcircled{+}}$  - [C<sub>2</sub>mim][TCM];  $\text{\textcircled{*}}$  - [C<sub>4</sub>mim][TCM]. Mahurin *et al.*<sup>7</sup>:  $\otimes$  - [C<sub>2</sub>mim][TCM].

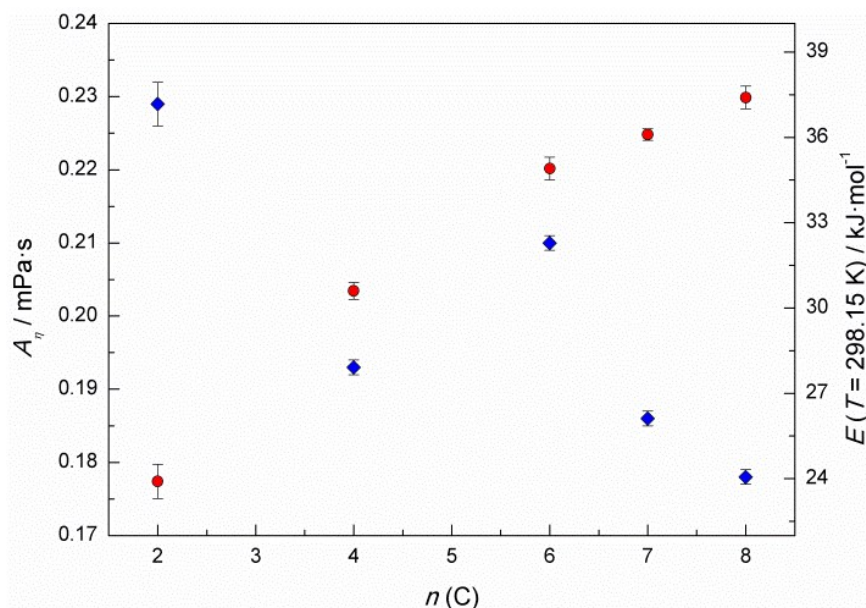

Figure S3: Pre-exponential coefficient of the VFT equation (6) ( $A_\eta$  / mPa·s), and energy barrier ( $E$  / kJ·mol<sup>-1</sup>) eq. (7) at  $T = 298.15$  K as function of the number of carbon atoms in the alkyl chains of the cation,  $n(C)$ .  $\ominus$  -  $E$  / kJ·mol<sup>-1</sup> and  $\diamond$  -  $A_\eta$  / mPa·s. Both plots show the parameters of  $[C_n\text{mim}][\text{TCM}]$  ILs.

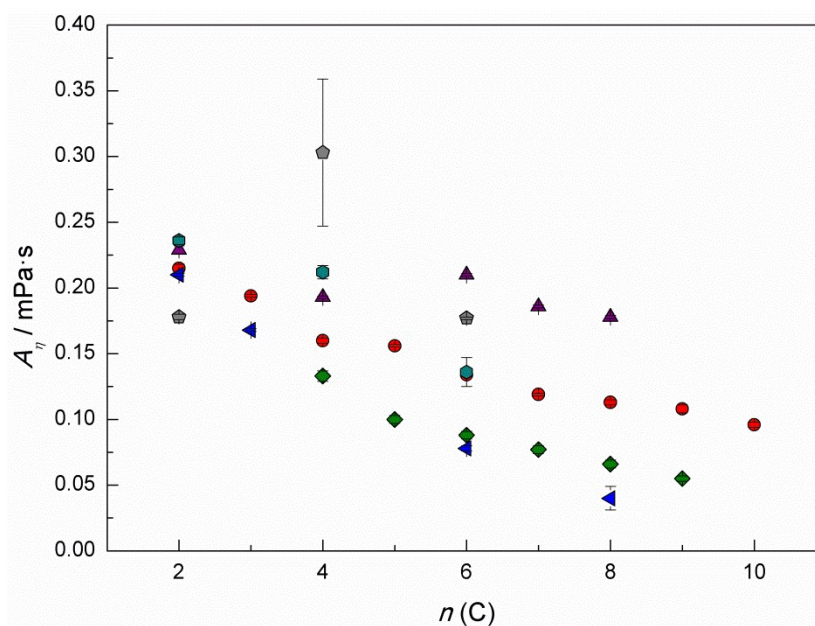

Figure S4: Pre-exponential coefficient of the VFT equation (6) ( $A_\eta$  / mPa·s) as function of the number of carbon atoms in the alkyl side chains of the cation,  $n(C)$ . This work:  $\blacksquare$  -  $[C_n\text{mim}][\text{TCM}]$  ( $n = 2, 4, 6 - 8$ ). Literature:  $\circ$  -  $[C_n\text{mim}][\text{Tf}_2\text{N}]$  ( $n = 2 - 10$ )<sup>7,8</sup>;  $\triangle$  -  $[C_n\text{mim}][\text{PF}_6]$  ( $n = 4 - 9$ )<sup>9</sup>;  $\odot$  -  $[C_n\text{mim}][\text{BF}_4]$  ( $n = 2, 3, 6, 8$ )<sup>10,11</sup>;  $\ominus$  -  $[C_n\text{mim}][\text{TCB}]$  ( $n = 2, 4, 6, 8, 10$ )<sup>12,13</sup>;  $\blacktriangledown$  -  $[C_n\text{mim}][\text{DCA}]$  ( $n = 2, 4, 6$ )<sup>13,14</sup>.



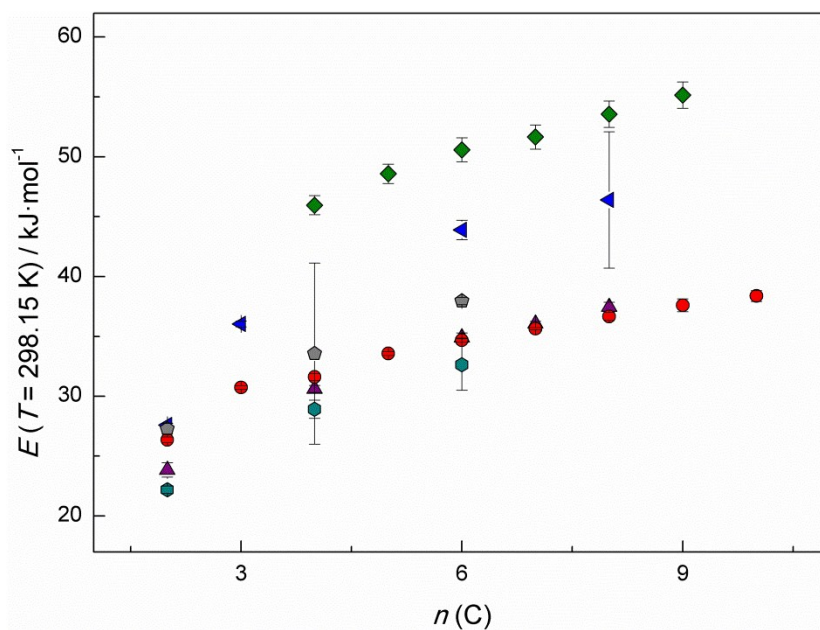

Figure S5: Energy barrier ( $E / \text{kJ}\cdot\text{mol}^{-1}$  eq. (7) at  $T = 298.15 \text{ K}$  as function of the number of carbon atoms in the alkyl side chains of the cation,  $n(\text{C})$ .  $\blacksquare$  -  $[\text{C}_n\text{mim}][\text{TCM}]$  ( $n = 2, 4, 6 - 8$ ). Literature:  $\circ$  -  $[\text{C}_n\text{mim}][\text{Tf}_2\text{N}]$  ( $n = 2 - 10$ )<sup>7,8</sup>;  $\oplus$  -  $[\text{C}_n\text{mim}][\text{PF}_6]$  ( $n = 4 - 9$ )<sup>9</sup>;  $\odot$  -  $[\text{C}_n\text{mim}][\text{BF}_4]$  ( $n = 2, 3, 6, 8$ )<sup>10,11</sup>;  $\ominus$  -  $[\text{C}_n\text{mim}][\text{TCB}]$  ( $n = 2, 4, 6, 8, 10$ )<sup>12,13</sup>;  $\blacktriangle$  -  $[\text{C}_n\text{mim}][\text{DCA}]$  ( $n = 2, 4, 6$ )<sup>13,14</sup>.

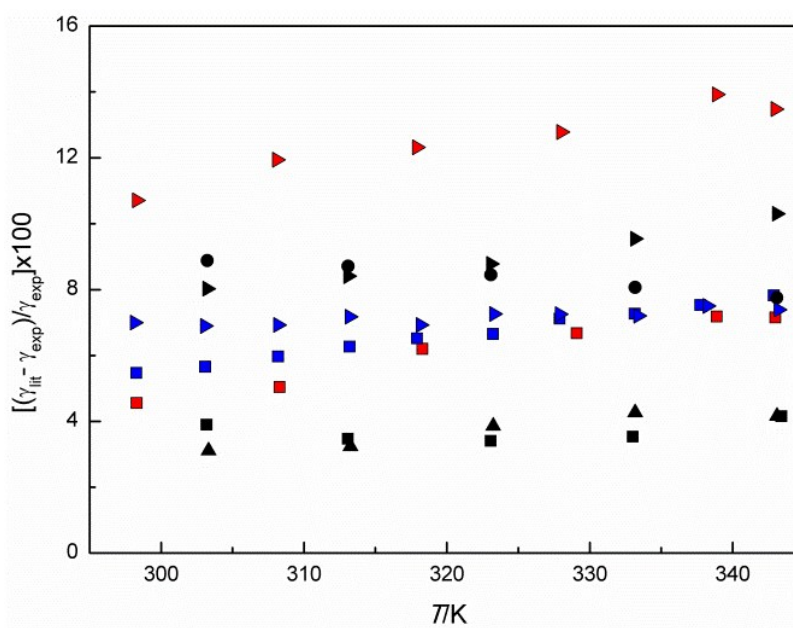

Figure S6: Relative deviation of the experimentally determined surface tension,  $\gamma_{\text{exp}}$ , data in this work and literature,  $\gamma_{\text{lit}}$ . Same symbols ( $\blacktriangleright$  -  $[\text{C}_2\text{mim}][\text{TCM}]$ ;  $\blacksquare$  -  $[\text{C}_4\text{mim}][\text{TCM}]$ ;  $\blacktriangleleft$  -  $[\text{C}_6\text{mim}][\text{TCM}]$ ;  $\bullet$  -  $[\text{C}_8\text{mim}][\text{TCM}]$ ) refer to the same IL while the same color (Koller *et al.* (black)<sup>11</sup>; Almeida *et al.* (red)<sup>12</sup>; Součková *et al.* (blue)<sup>13</sup>) to the same research group.

## References

- 1 L. F. Zubeir, G. E. Romanos, W. M. A. Weggemans, B. Iliev, T. J. S. Schubert and M. C. Kroon, *J. Chem. Eng. Data*, 2015, **60**, 1544–1562.
- 2 T. M. Koller, S. R. Schmid, S. J. Sachnov, M. H. Rausch, P. Wasserscheid and A. P. Fröba, *Int. J. Thermophys.*, 2014, **35**, 195–217.
- 3 P. J. Carvalho, T. Regueira, L. M. N. B. F. Santos, J. Fernandez and J. A. P. Coutinho, *J. Chem. Eng. Data*, 2010, **55**, 645–652.
- 4 M. Larriba, P. Navarro, J. García and F. Rodríguez, *Ind. Eng. Chem. Res.*, 2013, **52**, 2714–2720.
- 5 Y. Yoshida, K. Muroi, A. Otsuka, G. Saito, M. Takahashi and T. Yoko, *Inorg. Chem.*, 2004, **43**, 1458–1462.
- 6 C. M. S. S. Neves, K. A. Kurnia, J. A. P. Coutinho, I. M. Marrucho, J. N. C. Lopes, M. G. Freire and L. P. N. Rebelo, *J. Phys. Chem. B*, 2013, **117**, 10271–10283.
- 7 S. M. Mahurin, J. S. Lee, G. A. Baker, H. Luo and S. Dai, *J. Memb. Sci.*, 2010, **353**, 177–183.
- 8 R. L. Gardas, M. G. Freire, P. J. Carvalho, I. M. Marrucho, I. M. A. Fonseca, A. G. M. Ferreira and J. A. P. Coutinho, *J. Chem. Eng. Data*, 2007, **52**, 1881–1888.
- 9 M. Królikowski, K. Walczak and U. Domańska, *J. Chem. Thermodyn.*, 2013, **65**, 168–173.
- 10 S. Bi, T. M. Koller, M. H. Rausch, P. Wasserscheid and A. P. Fröba, *Ind. Eng. Chem. Res.*, 2015, **54**, 3071–3081.
- 11 T. M. Koller, M. H. Rausch, K. Pohako-esko, P. Wasserscheid and A. P. Fro, *J. Chem. Eng. Data*, 2015, **60**, 2665–2673.
- 12 H. F. D. Almeida, M. G. Freire, A. M. Fernandes, J. A. Lopes-Da-Silva, P. Morgado, K. Shimizu, E. J. M. Filipe, J. N. Canongia Lopes, L. M. N. B. F. Santos and J. A. P. Coutinho, *Langmuir*, 2014, **30**, 6408–6418.
- 13 M. Součková, J. Klomfar and J. Pátek, *Fluid Phase Equilib.*, 2015, **406**, 181–193.
